# Supplementary material
Source: Springer Nature journal article supplement (https://www.springermedizin.de/resource/supplementary/12958_2011_927_MOESM2_ESM.pdf/9568834)
Supplement: MOESM2 [file 9568834]

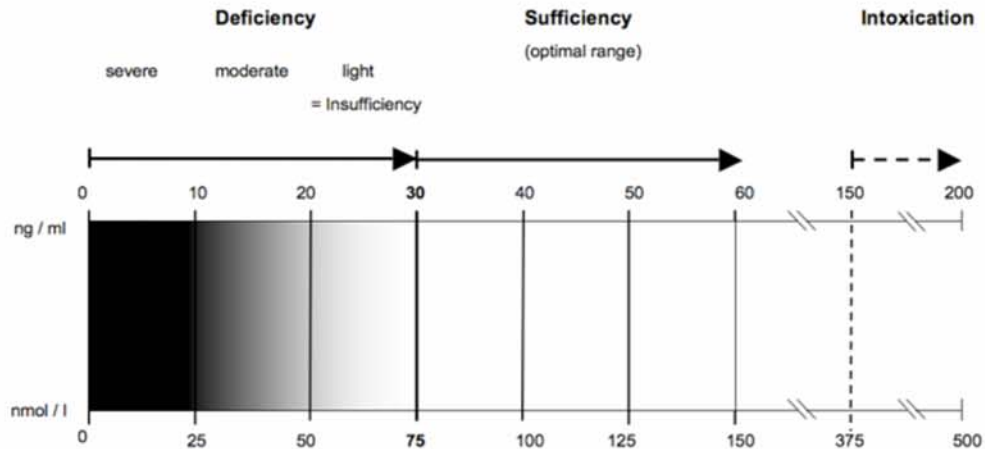

**Current recommendations for daily vitamin D<sub>3</sub> intake (IOM 2010):**

0-12 month: 400 IU

1-70 years, pregnant and lactating women: 600 IU

>70 years: 800 IU
